# Supplementary figures and images for: Quality control in oocytes by p63 is based on a spring-loaded activation mechanism on the molecular and cellular level
Source: eLife journal article supplement (doi:10.7554/elife.13909), 2016-03-14

**A**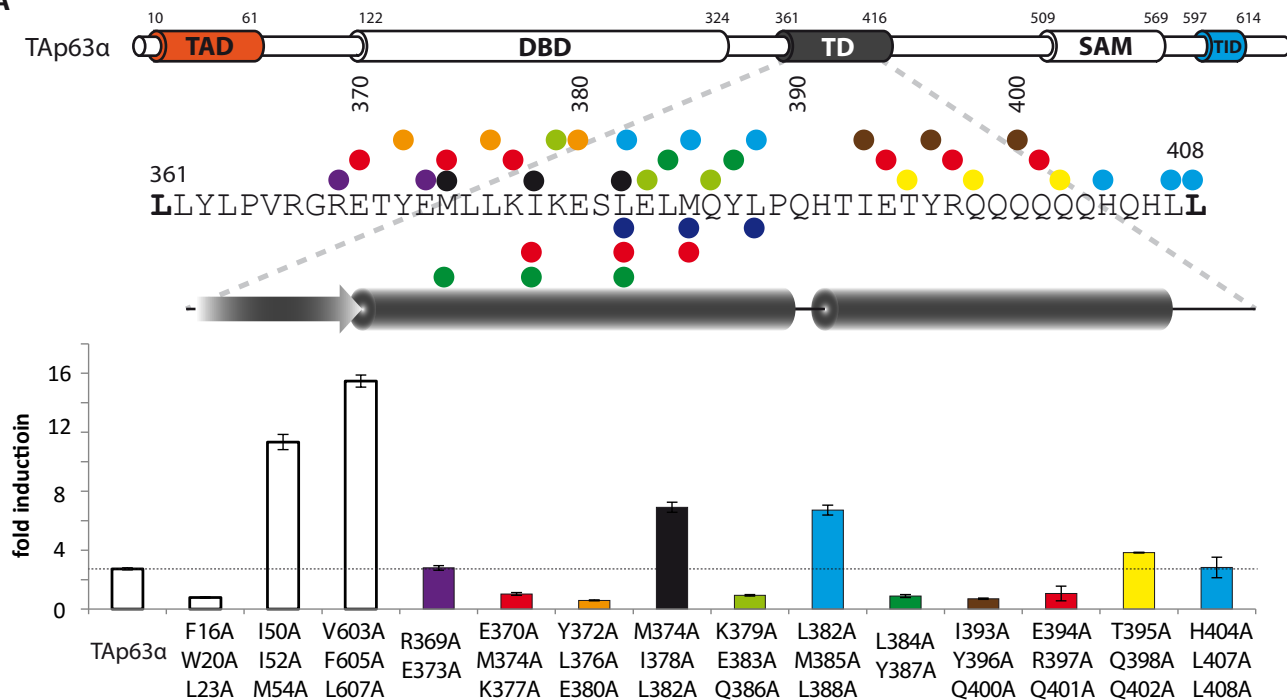**B**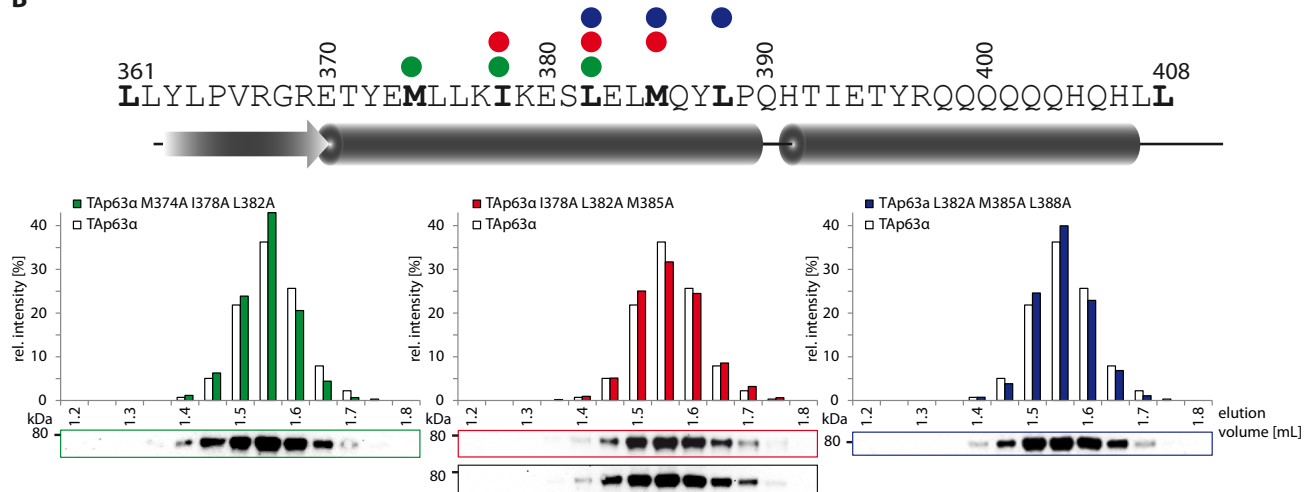

Supplement: supp [file elife-13909-supp-v1.zip]

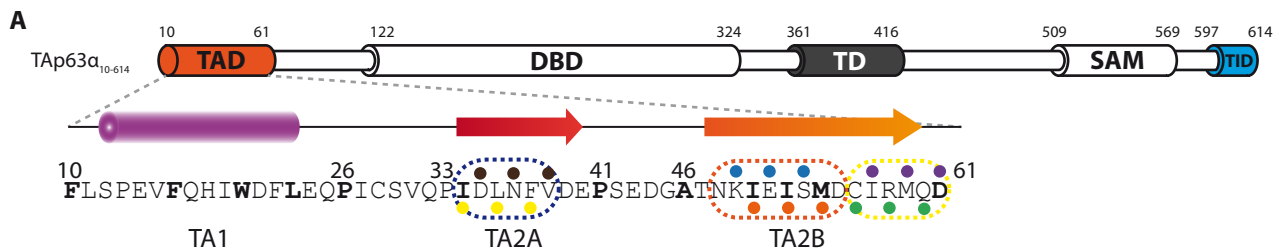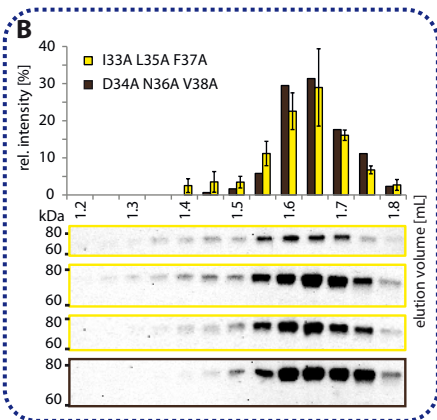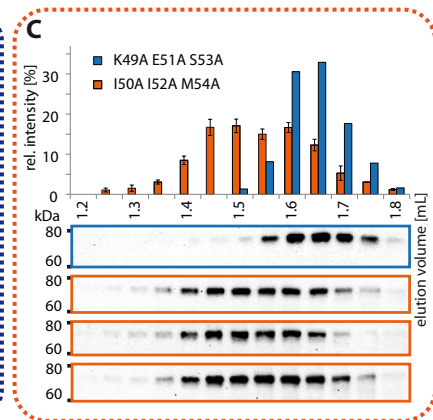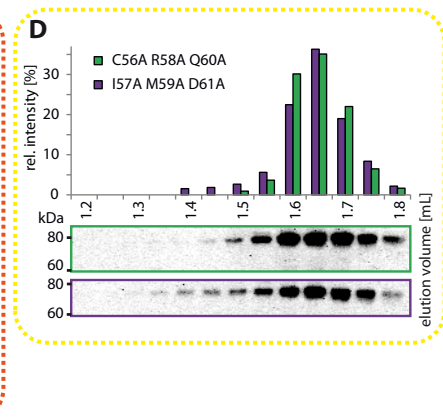

Supplement: supp [file elife-13909-supp-v1.zip]

**A**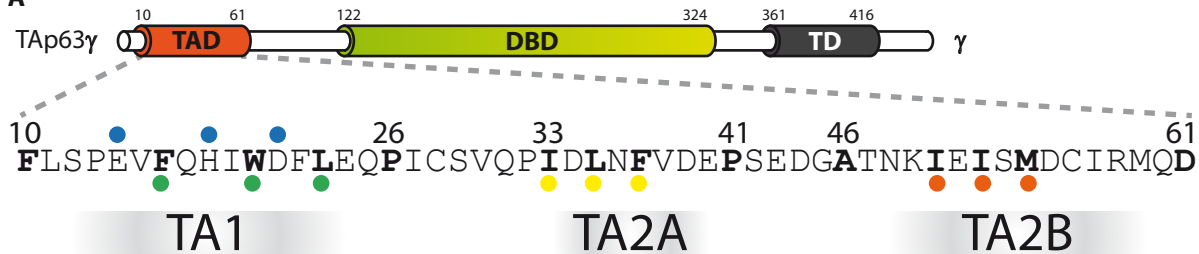**B**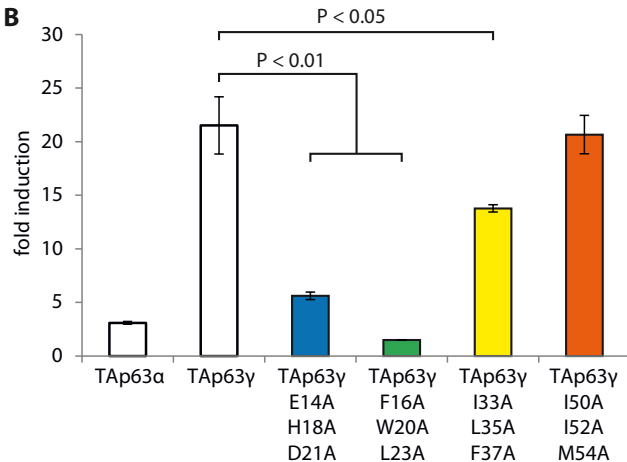**C**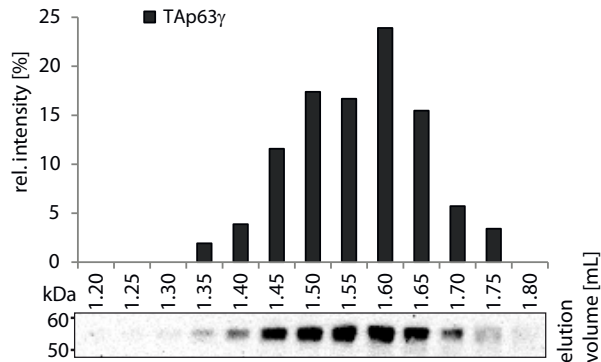

Supplement: supp [file elife-13909-supp-v1.zip]

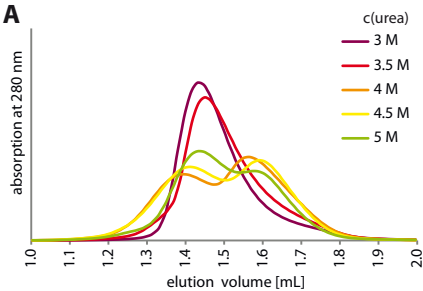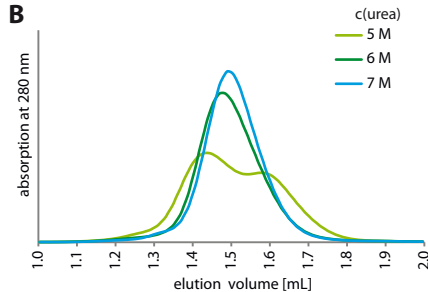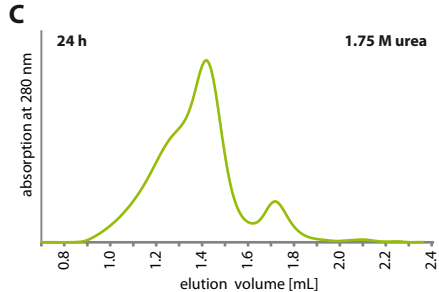

Supplement: supp [file elife-13909-supp-v1.zip]

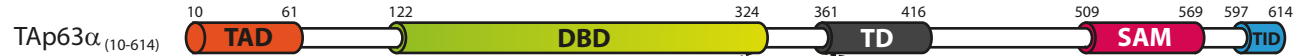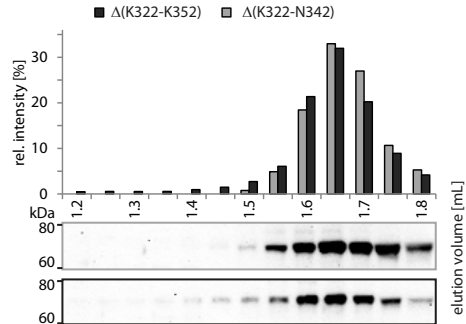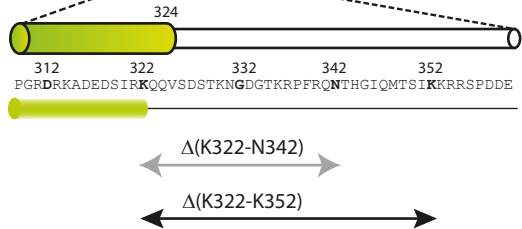

Supplement: supp [file elife-13909-supp-v1.zip]

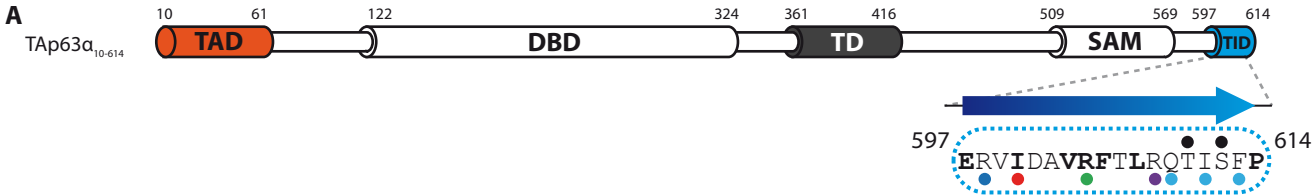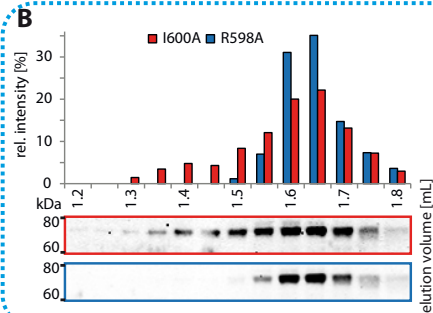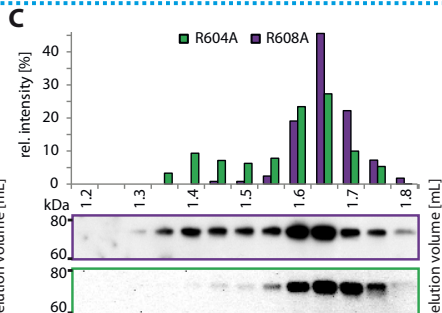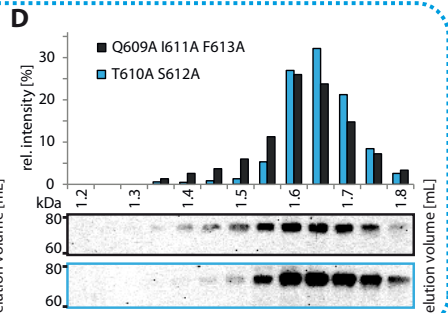

Supplement: supp [file elife-13909-supp-v1.zip]

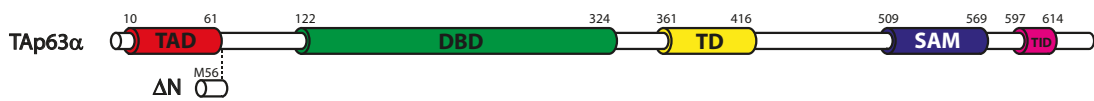

DBD-TD-SAM

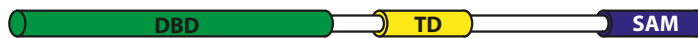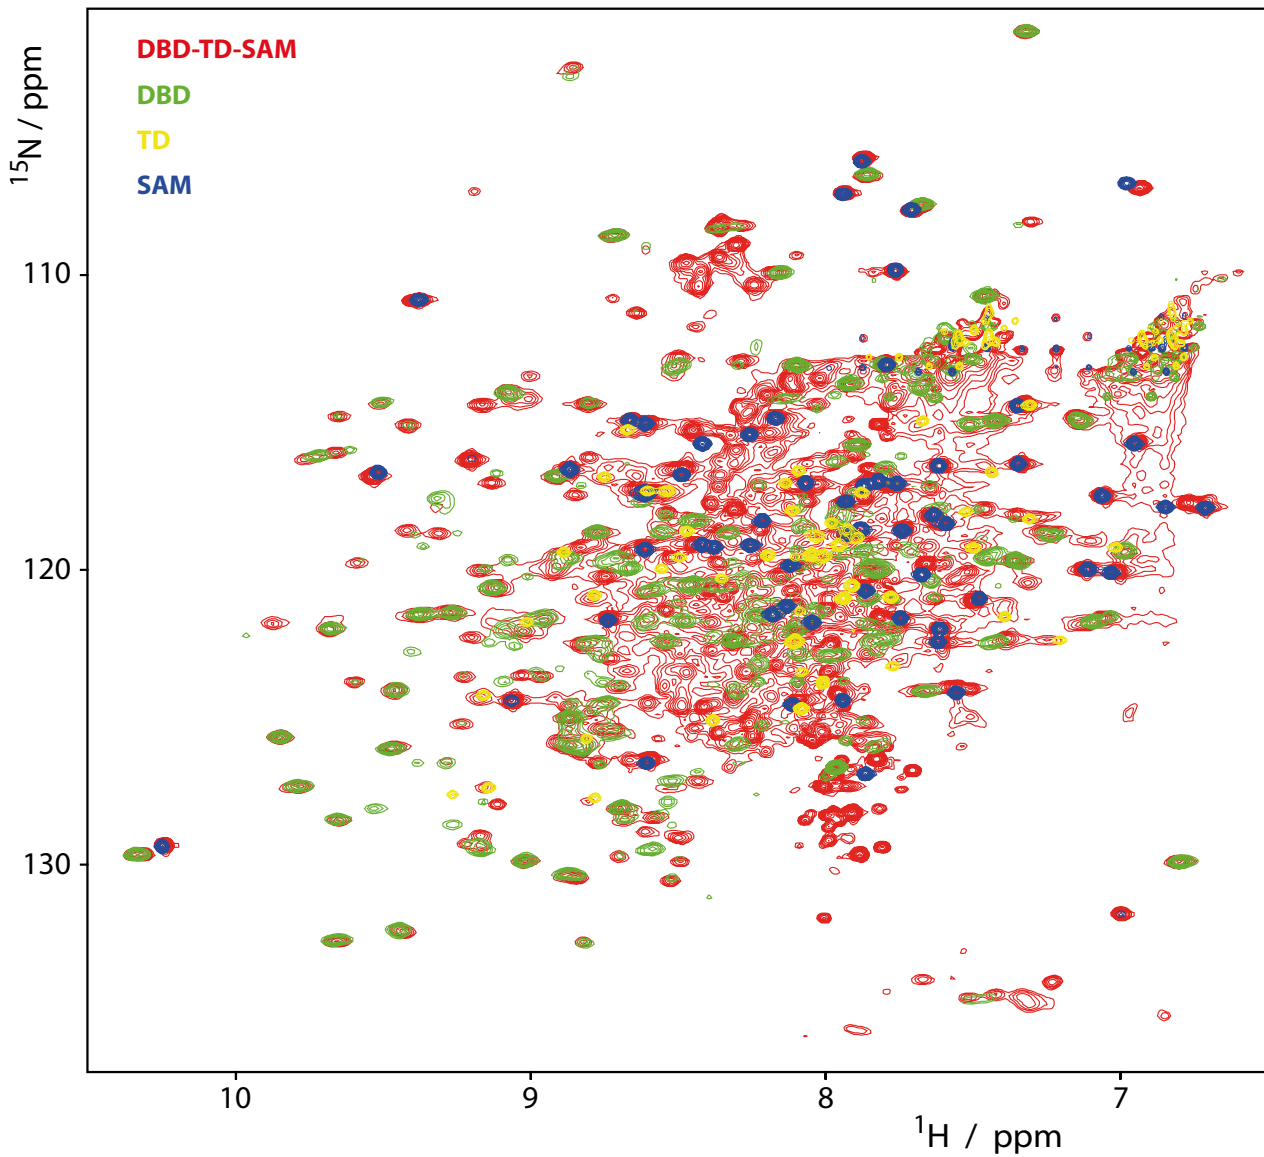

Supplement: supp [file elife-13909-supp-v1.zip]

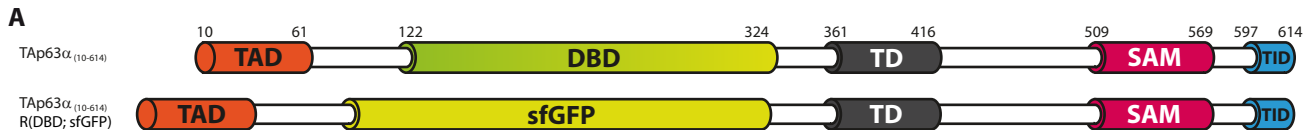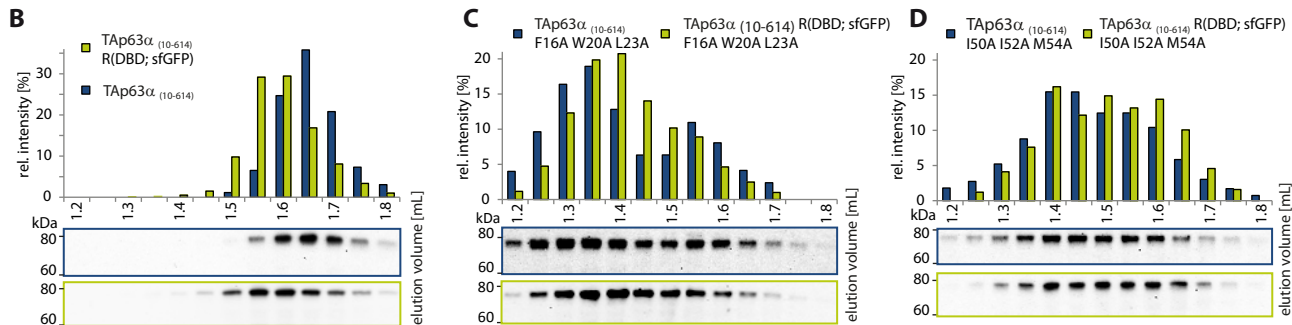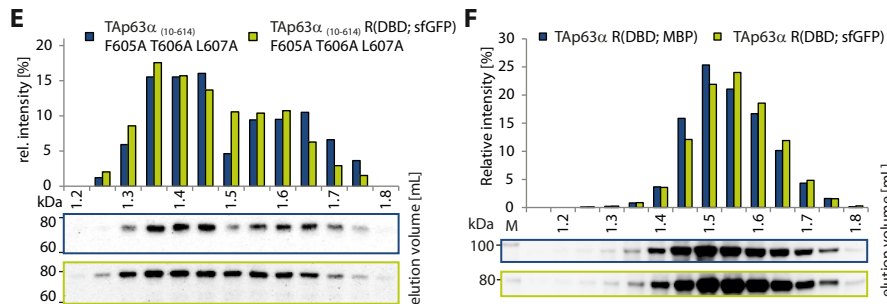

Supplement: supp [file elife-13909-supp-v1.zip]

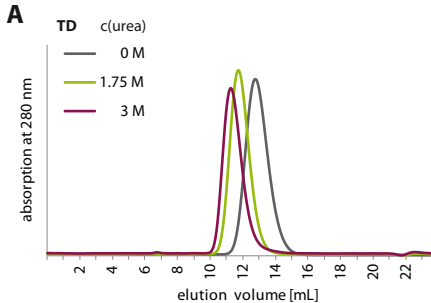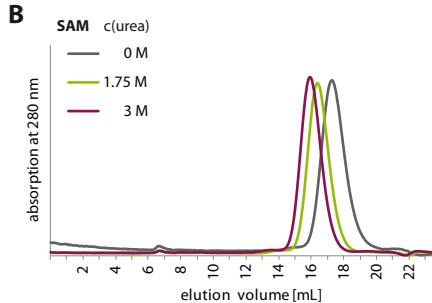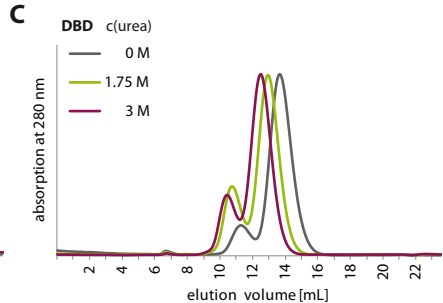

Supplement: supp [file elife-13909-supp-v1.zip]

**A**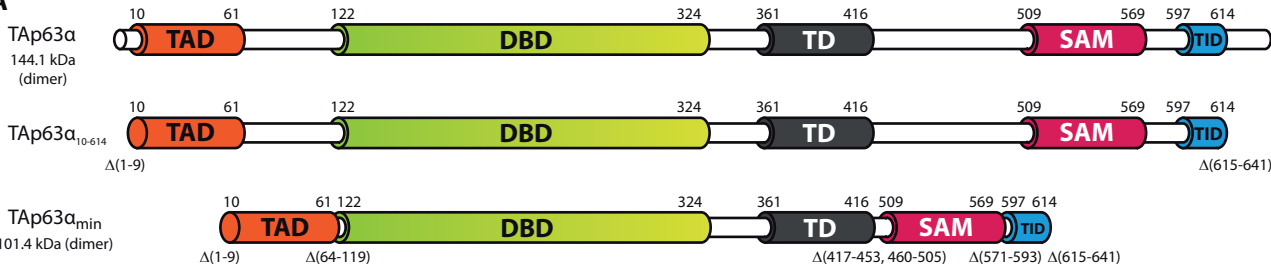**B**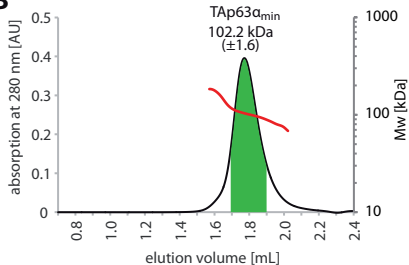**C**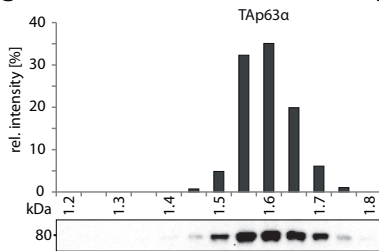**D**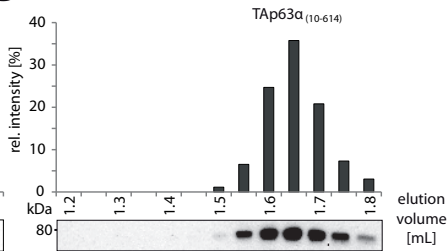

Supplement: supp [file elife-13909-supp-v1.zip]

**A**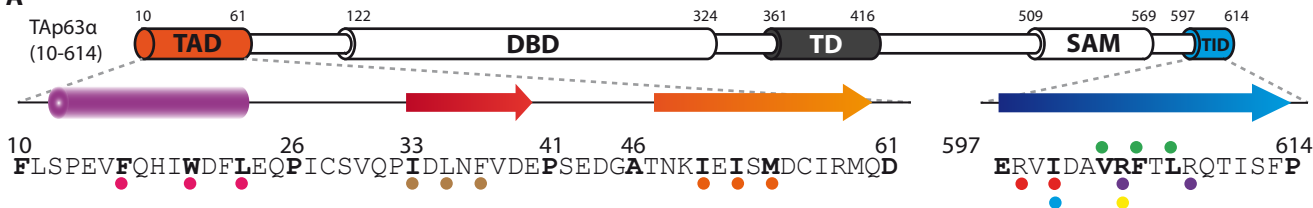**B**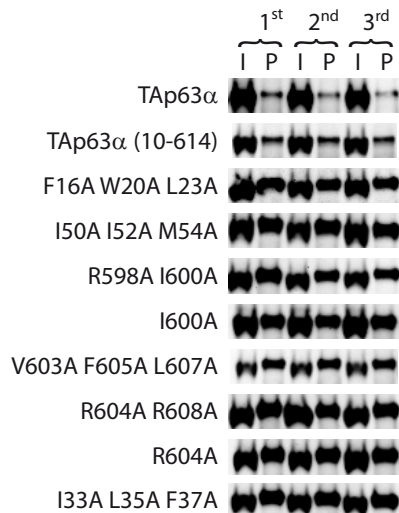**C**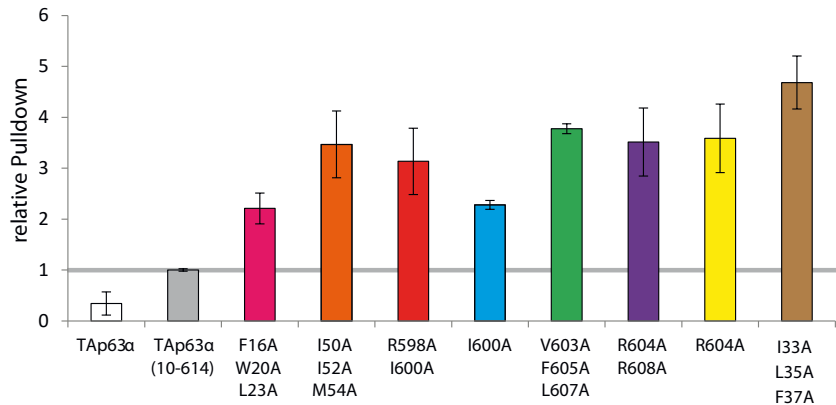

Supplement: supp [file elife-13909-supp-v1.zip]

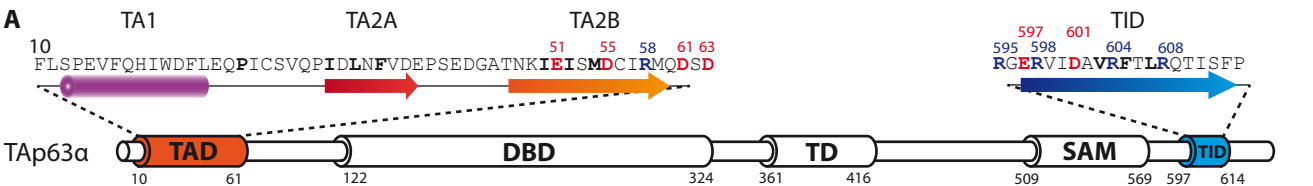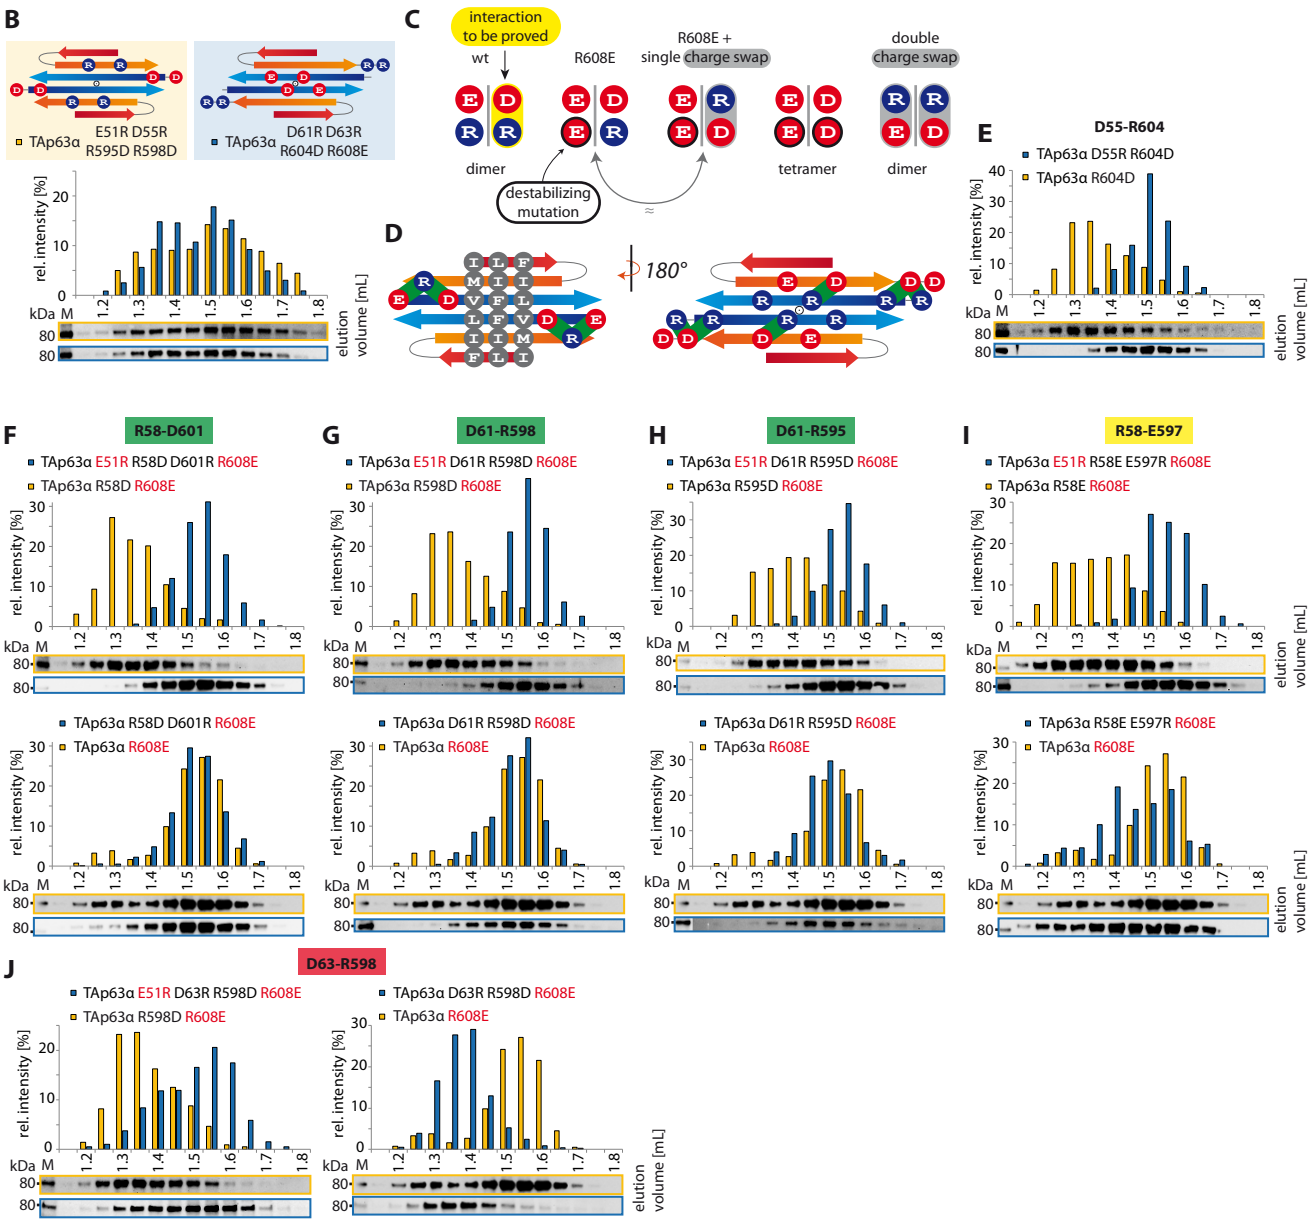

Supplement: supp [file elife-13909-supp-v1.zip]
